# Supplementary material for: Dinuclear complexes, a one dimensional chain and a two dimensional layer of bismuth(iii) chalcogenones for C–S cross coupling reactions
Source: Royal Society of Chemistry journal article supplement (doi:10.1039/d2nj01151d), 2022-01-01
Supplement: d2nj01151d1.pdf [file d2nj01151d1.pdf]

## Supporting Information

| Contents          | Table of contents                                                                                                         | Page no |
|-------------------|---------------------------------------------------------------------------------------------------------------------------|---------|
| <b>Figure S1</b>  | FT-IR spectrum of <b>1</b> (neat)                                                                                         | 2       |
| <b>Figure S2</b>  | <sup>1</sup> H NMR spectrum of <b>1</b> in DMSO- <i>d</i> <sub>6</sub> at RT                                              | 2       |
| <b>Figure S3</b>  | <sup>13</sup> C NMR spectrum of <b>1</b> in DMSO- <i>d</i> <sub>6</sub> at RT                                             | 3       |
| <b>Figure S4</b>  | FT-IR spectrum of <b>2</b> (neat)                                                                                         | 3       |
| <b>Figure S5</b>  | <sup>1</sup> H NMR spectrum of <b>2</b> in DMSO- <i>d</i> <sub>6</sub> at RT                                              | 4       |
| <b>Figure S6</b>  | <sup>13</sup> C NMR spectrum of <b>2</b> in DMSO- <i>d</i> <sub>6</sub> at RT                                             | 4       |
| <b>Figure S7</b>  | FT-IR spectrum of <b>3</b> (neat)                                                                                         | 5       |
| <b>Figure S8</b>  | <sup>1</sup> H NMR spectrum of <b>3</b> in DMSO- <i>d</i> <sub>6</sub> at RT                                              | 5       |
| <b>Figure S9</b>  | <sup>13</sup> C NMR spectrum of <b>3</b> in DMSO- <i>d</i> <sub>6</sub> at RT                                             | 6       |
| <b>Figure S10</b> | FT-IR spectrum of <b>4</b> (neat)                                                                                         | 6       |
| <b>Figure S11</b> | <sup>1</sup> H NMR spectrum of <b>4</b> in DMSO- <i>d</i> <sub>6</sub> at RT                                              | 7       |
| <b>Figure S12</b> | <sup>13</sup> C NMR spectrum of <b>4</b> in DMSO- <i>d</i> <sub>6</sub> at RT                                             | 7       |
| <b>Figure S13</b> | <sup>1</sup> H NMR spectrum of <b>I</b> in CDCl <sub>3</sub> at RT                                                        | 8       |
| <b>Figure S14</b> | <sup>1</sup> H NMR spectrum of <b>II</b> in CDCl <sub>3</sub> at RT                                                       | 8       |
| <b>Figure S15</b> | <sup>1</sup> H NMR spectrum of <b>III</b> in CDCl <sub>3</sub> at RT                                                      | 9       |
| <b>Figure S16</b> | <sup>1</sup> H NMR spectrum of <b>IV</b> in CDCl <sub>3</sub> at RT                                                       | 10      |
| <b>Figure S17</b> | <sup>13</sup> C NMR spectrum of <b>IV</b> in CDCl <sub>3</sub> at RT                                                      | 10      |
| <b>Figure S18</b> | <sup>1</sup> H NMR spectrum of <b>V</b> in CDCl <sub>3</sub> at RT                                                        | 11      |
| <b>Figure S19</b> | <sup>13</sup> C NMR spectrum of <b>V</b> in CDCl <sub>3</sub> at RT                                                       | 11      |
| <b>Figure S20</b> | Molecular structure of <b>4</b> with intramolecular hydrogen bonding.<br>Molecule <b>1</b> is isostructural to <b>4</b> . | 12      |
| <b>Figure S21</b> | A weak $\pi \cdots \pi$ stacking interaction between acridine rings in <b>IV</b> .                                        | 13      |
| <b>Figure S22</b> | A weak $\pi \cdots \pi$ stacking interaction between acridine rings in <b>V</b> .                                         | 13      |
| <b>Table S1</b>   | Crystal data and structure refinement for <b>1-4</b>                                                                      | 14      |
| <b>Table S1</b>   | Crystal data and structure refinement for <b>IV</b> and <b>V</b>                                                          | 15      |

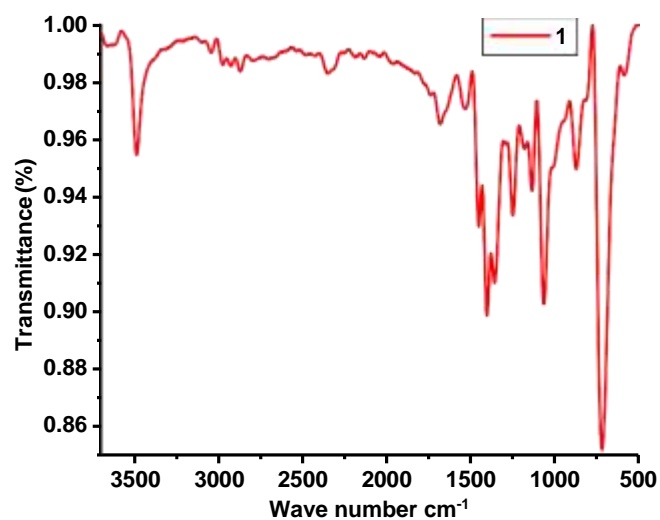

Figure S1. FT-IR spectrum of **1** (neat).

MM-219A-1H

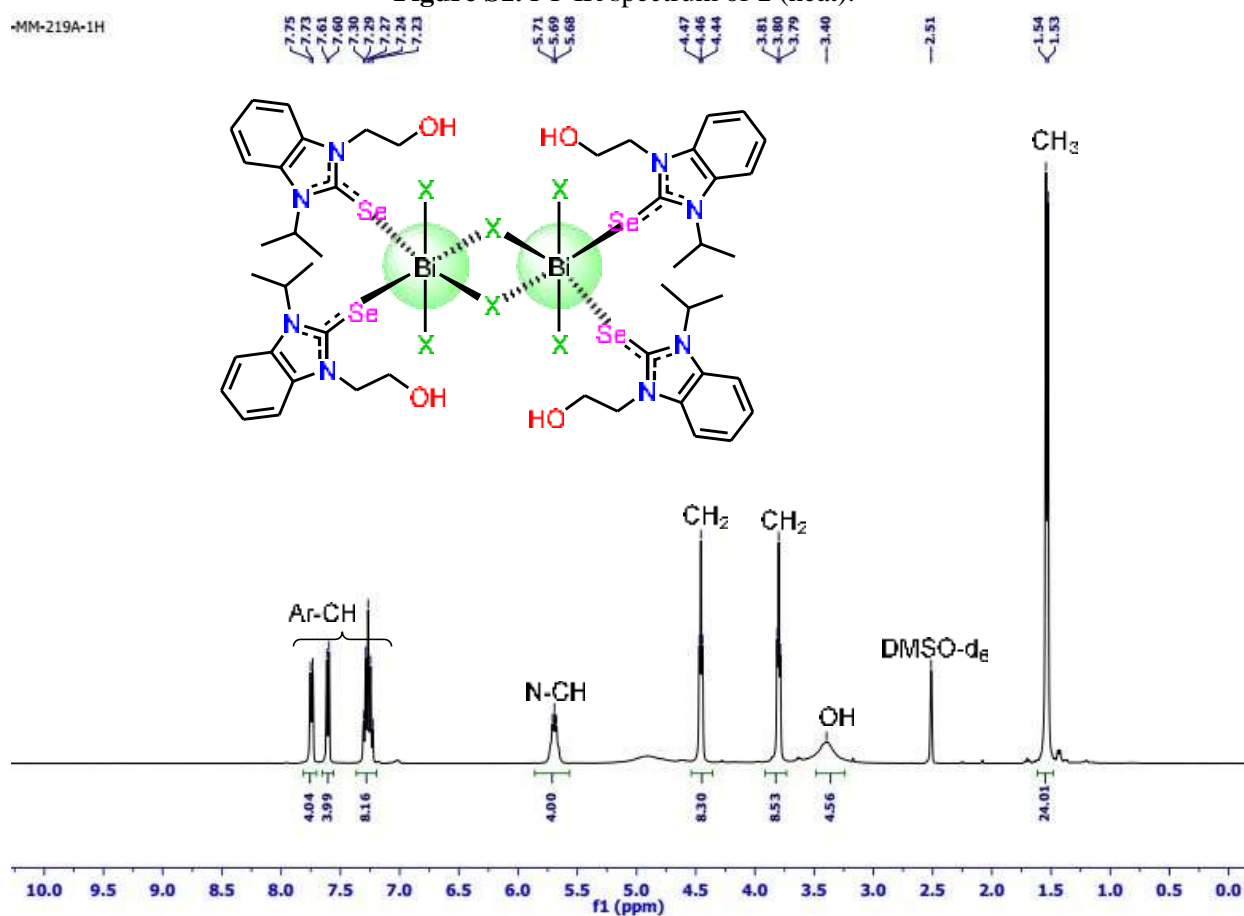

Figure S2.  $^1\text{H}$  NMR spectrum of **1** in  $\text{DMSO-}d_6$  at RT.

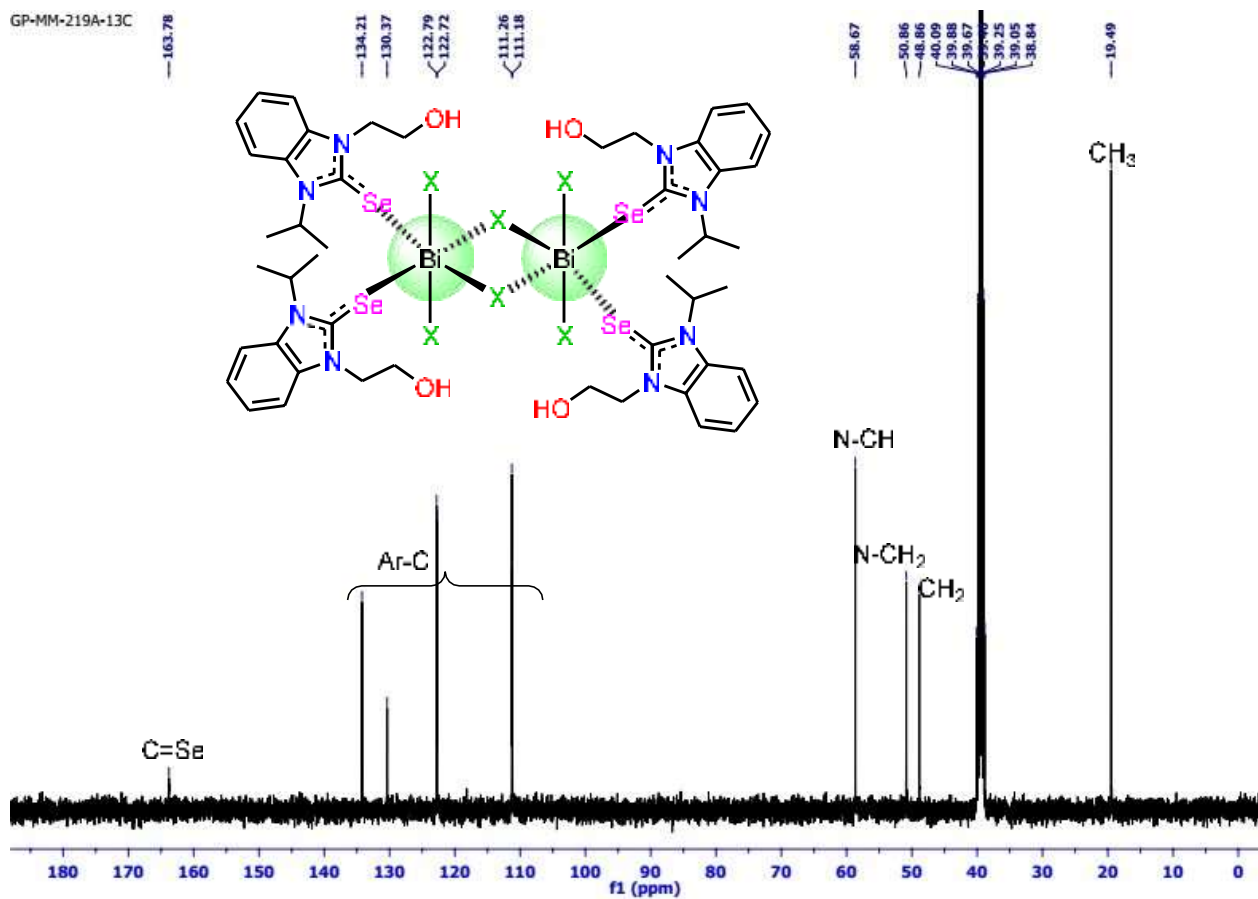

Figure S3. <sup>13</sup>C NMR spectrum of **1** in DMSO-*d*<sub>6</sub> at RT.

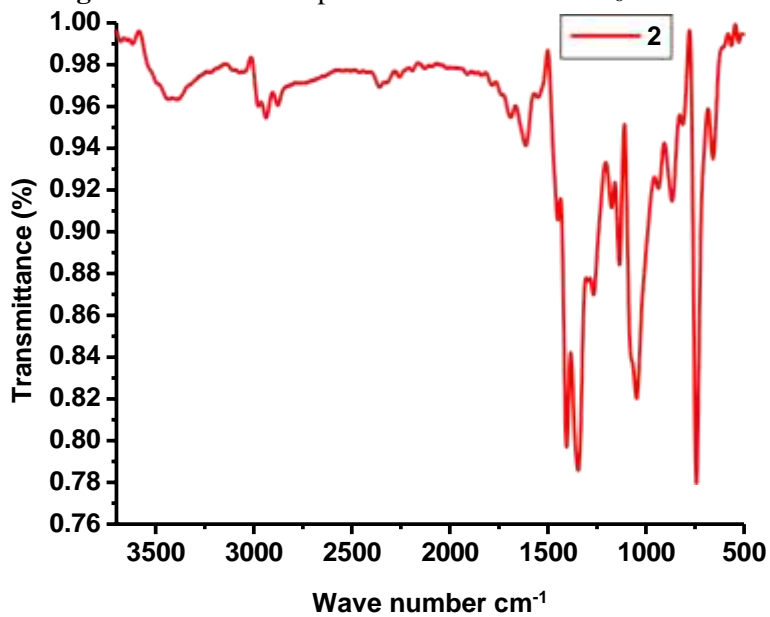

Figure S4. FT-IR spectrum of **2** (neat).



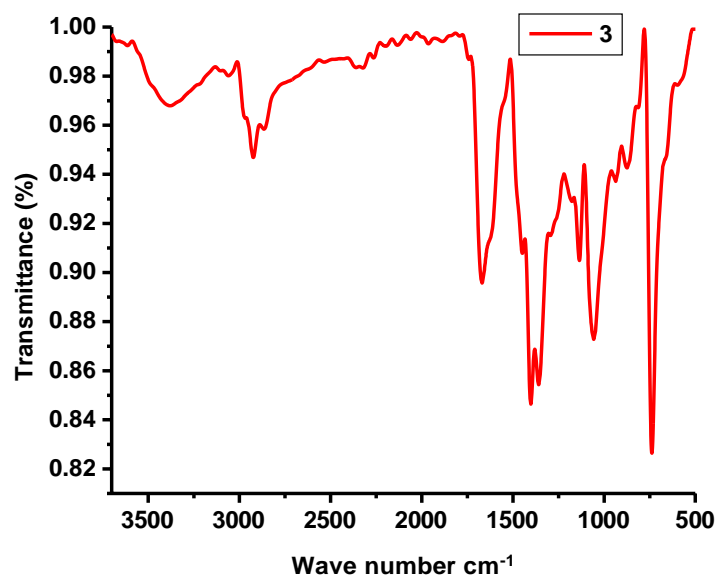

Figure S7. FT-IR spectrum of 3.CH<sub>3</sub>CN (neat).

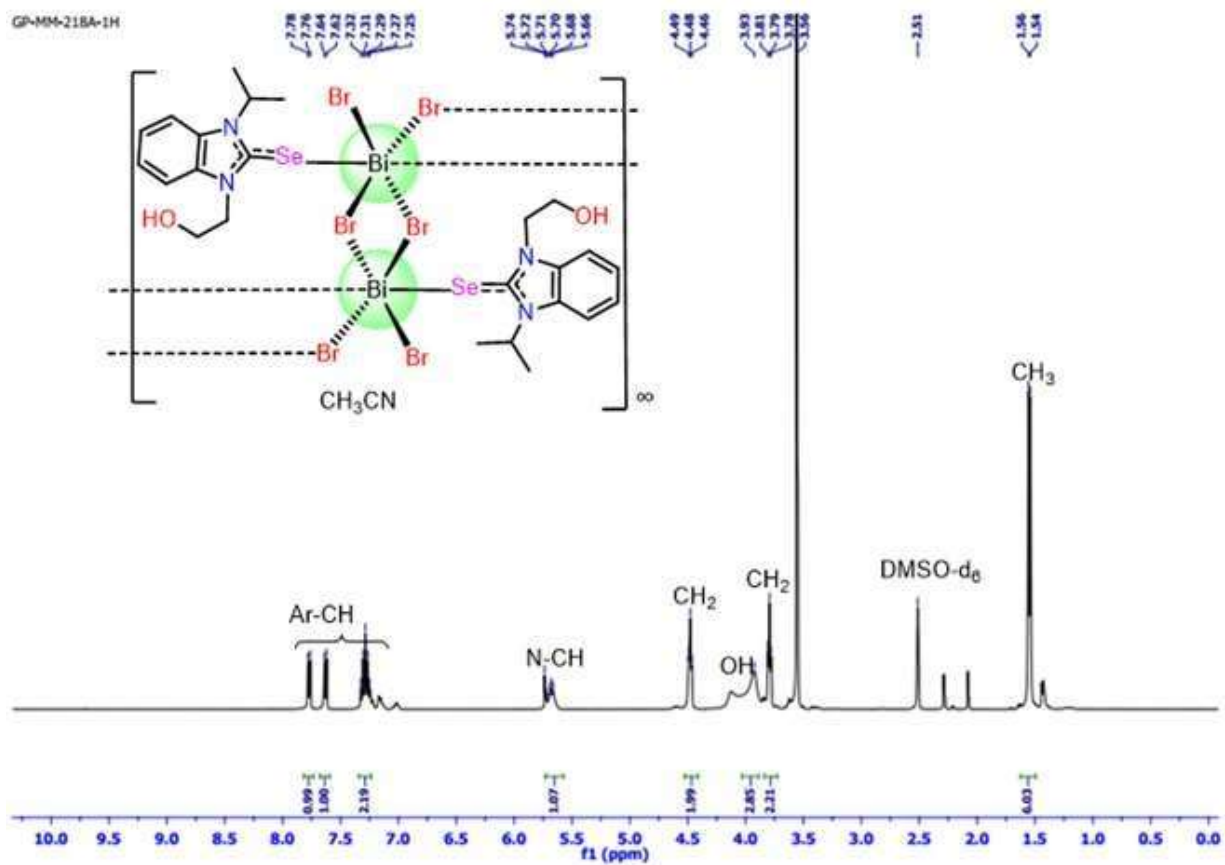

Figure S8. <sup>1</sup>H NMR spectrum of 3.CH<sub>3</sub>CN in DMSO-*d*<sub>6</sub> at RT.

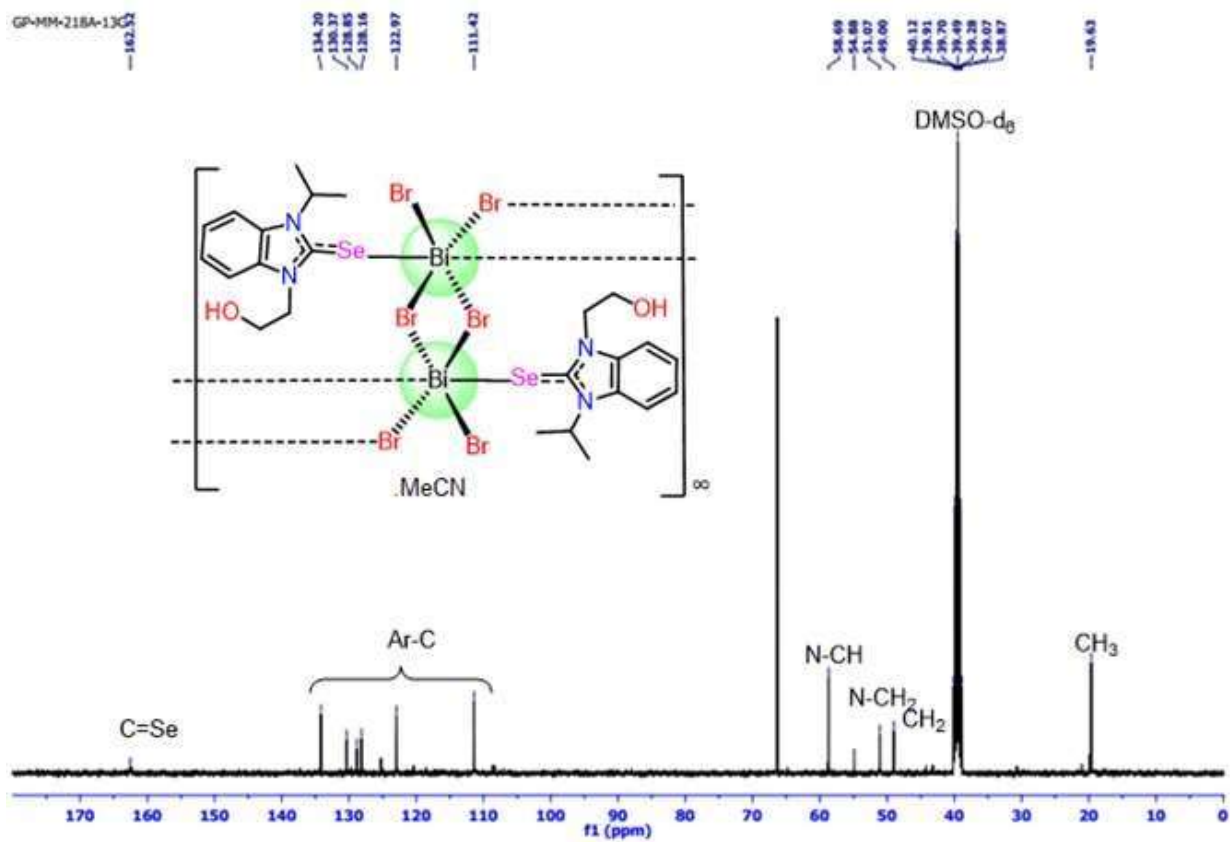

Figure S9.  $^{13}\text{C}$  NMR spectrum of **3**.CH<sub>3</sub>CN in DMSO- $d_6$  at RT.

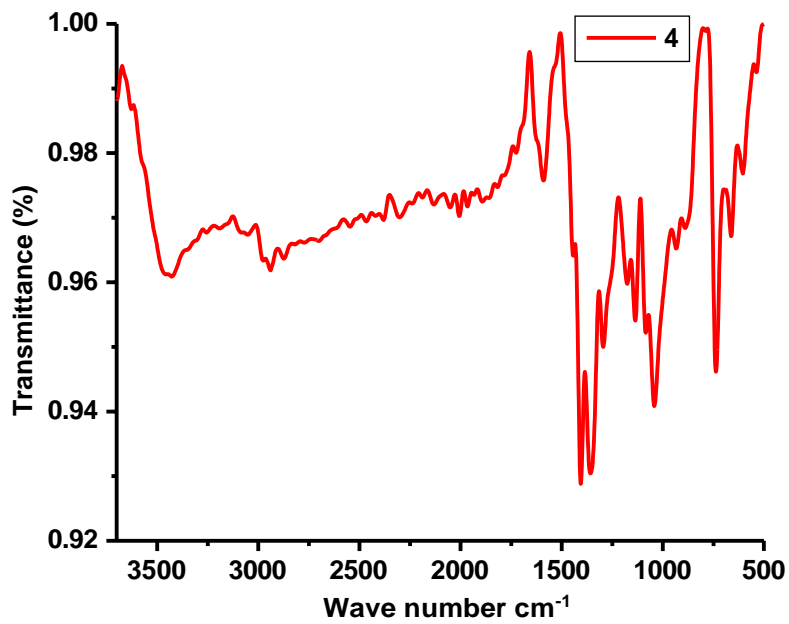

Figure S10. FT-IR spectrum of **4** (neat).

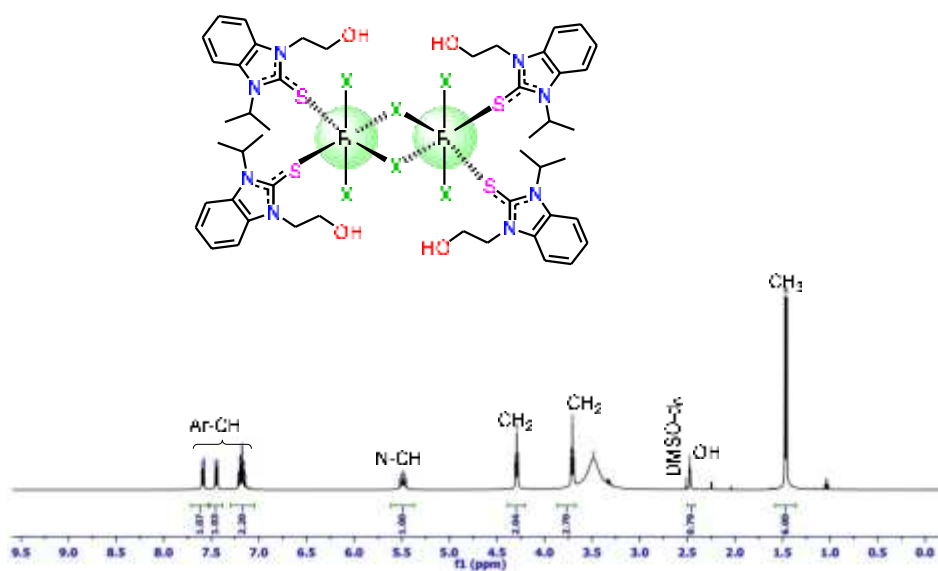

Figure S11.  $^1\text{H}$  NMR spectrum of **4** in  $\text{DMSO-}d_6$  at RT.

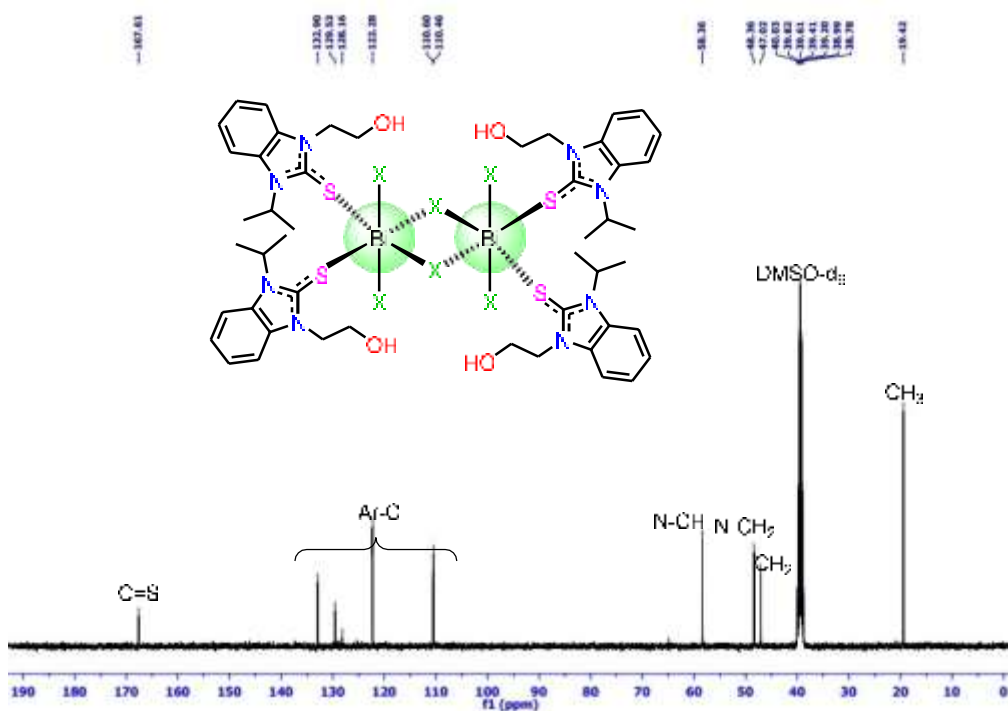

Figure S12.  $^{13}\text{C}$  NMR spectrum of **4** in  $\text{DMSO-}d_6$  at RT.

## C-S cross coupling reaction

Entry I:

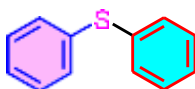

(Phenylsulfanyl)benzene. Chemical formula  $C_{12}H_{10}S$ ; Colourless liquid.  $^1H$  NMR ( $CDCl_3$ , 400.130 MHz):  $\delta$  7.40-7.29 (m, 10H).

Entry II:

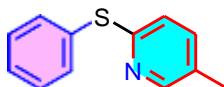

4-methyl-2-(phenylthio)pyridine. Chemical formula  $C_{12}H_{11}NS$ ; Colourless liquid.  $^1H$  NMR ( $CDCl_3$ , 400.130 MHz): 2.36 (s, 3 H), 6.81 (d, 1H), 6.92 (d, 1 H), 6.93 (d, 2 H), 7.19 (d, 2H), 7.36–7.46 (m, 1 H), 8.37 (d, 1 H).

Entry III:

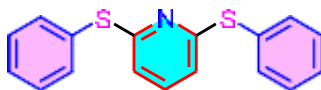

2,6-bis(phenylthio)pyridine. Chemical formula  $C_{17}H_{13}NS_2$ ; White solid.  $^1H$  NMR ( $CDCl_3$ , 400.130 MHz):  $\delta$  6.44 (d, 2H), 7.10 (t, 1H), 7.30-7.32 (m, 6H, including  $CDCl_3$  peak as it is not well resolved), 7.48-7.50 (m, 4H).

Entry IV:

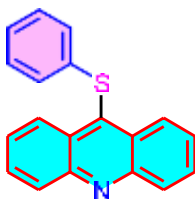

9-(phenylthio)acridine. Chemical formula  $C_{19}H_{13}NS$ ; Yellow solid.  $^1H$  NMR ( $CDCl_3$ , 400.130 MHz):  $\delta$  6.93-7.08 (m, 5H), 7.49-7.53 (t, 2H), 7.12-7.15 (t, 2H), 8.21-8.23(d, 2H), 8.63-8.65 (d, 2H).  $^{13}C$  NMR ( $CDCl_3$ , 100.612 MHz):  $\delta$  158.73, 149.15, 146.42, 139.20, 130.34, 130.20, 129.20, 129.04, 127.46, 127.15, 126.77, 125.93.

Entry V:



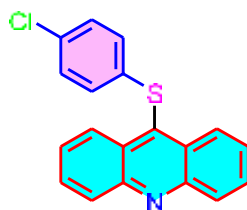

9-((4-chlorophenyl)thio)acridine. Chemical formula  $C_{19}H_{12}ClNS$ ; Yellow solid.  $^1H$  NMR ( $CDCl_3$ , 400.130 MHz):  $\delta$  6.92 (d, 2H), 7.09 (d, 2H), 7.57-7.6 (t, 2H), 7.19-7.83 (m, 2H), 8.29 (d, 2H), 8.65 (d, 2H).  $^{13}C$  NMR ( $CDCl_3$ , 100.612 MHz):  $\delta$  149.18, 138.45, 135.45, 131.90, 130.37, 129.33, 128.85, 128.67, 127.37, 126.48.

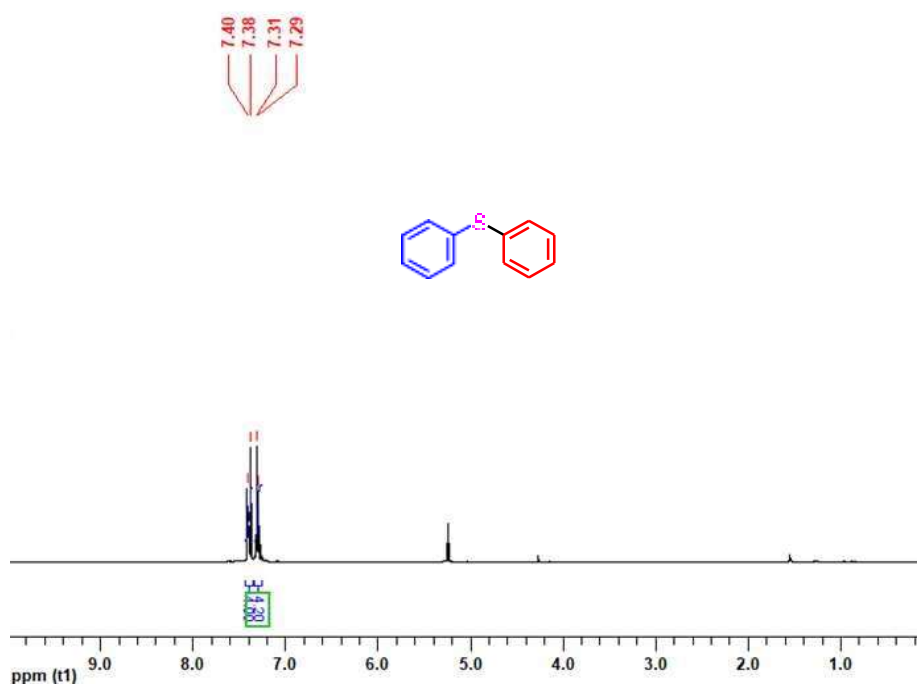

Figure S13.  $^1H$  NMR spectrum of **I** in  $CDCl_3$  at RT.

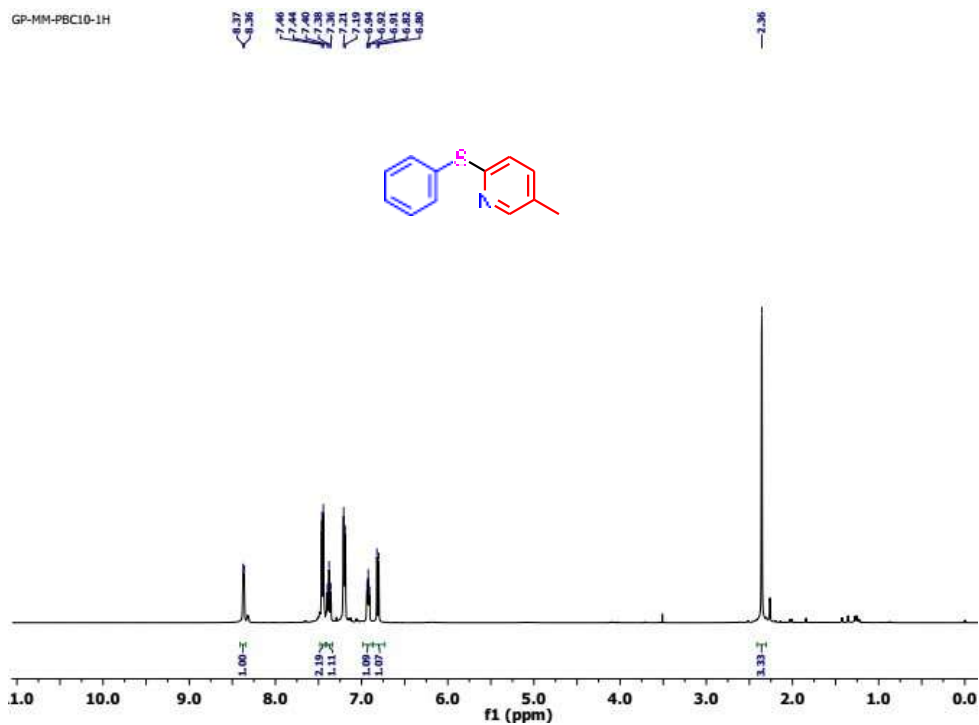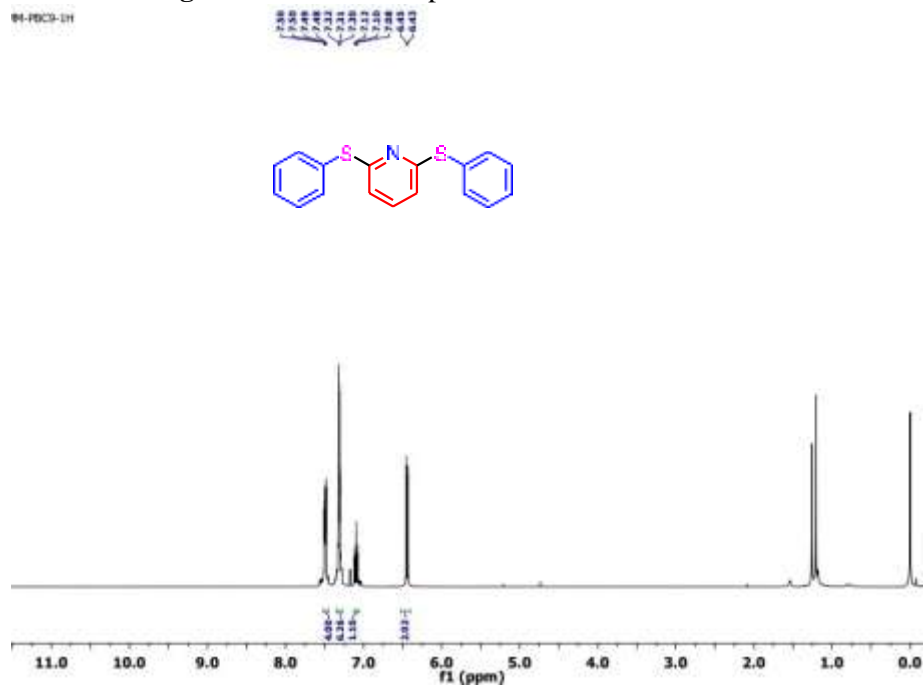

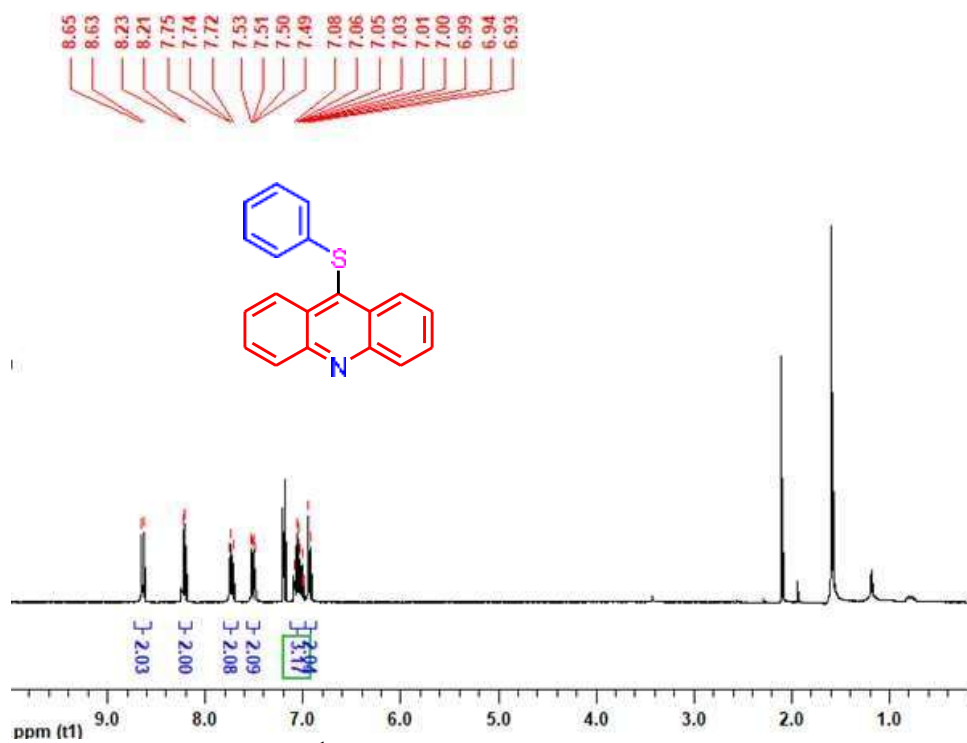

Figure S16. <sup>1</sup>H NMR spectrum of IV in CDCl<sub>3</sub> at RT.

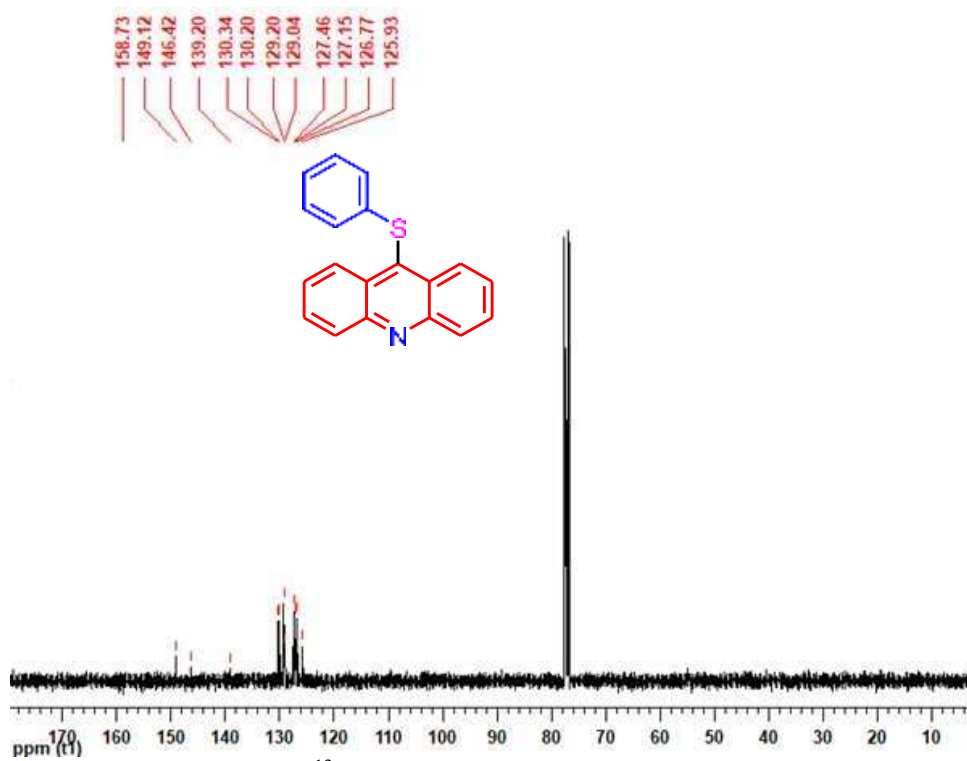

Figure S17. <sup>13</sup>C NMR spectrum of IV in CDCl<sub>3</sub> at RT.

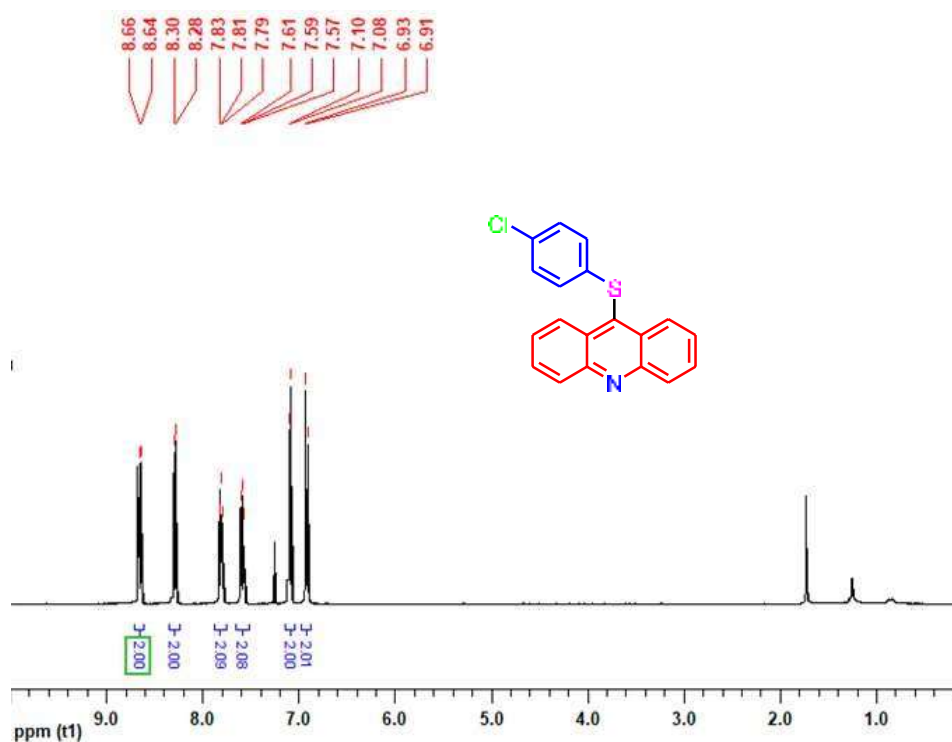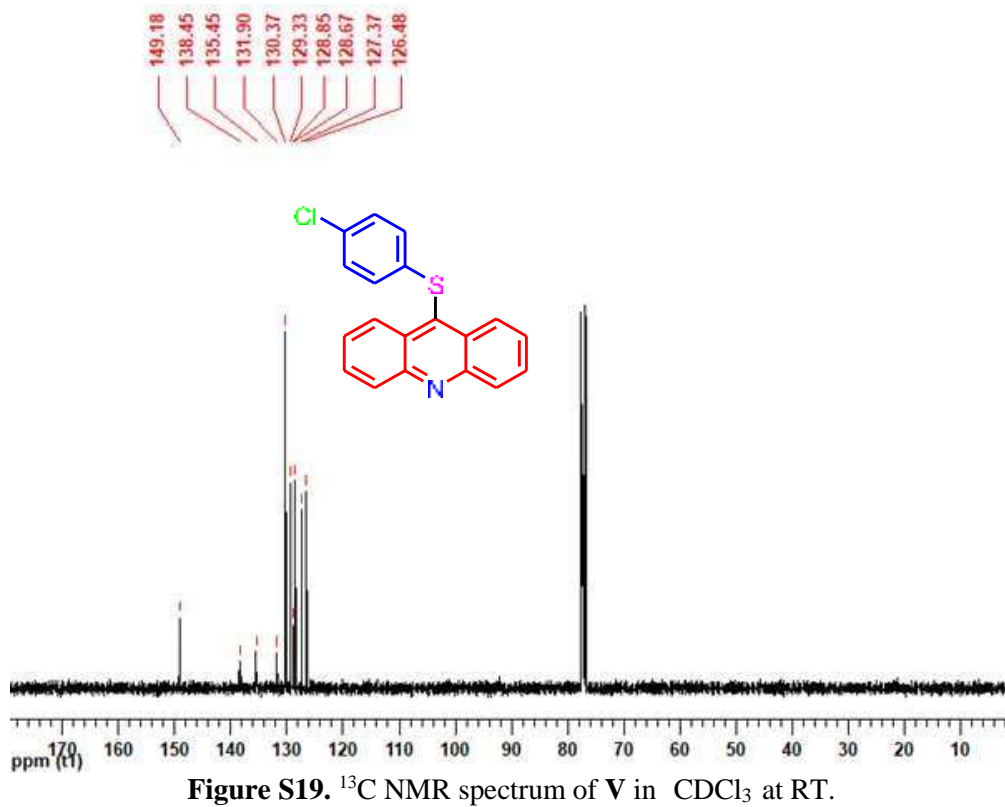

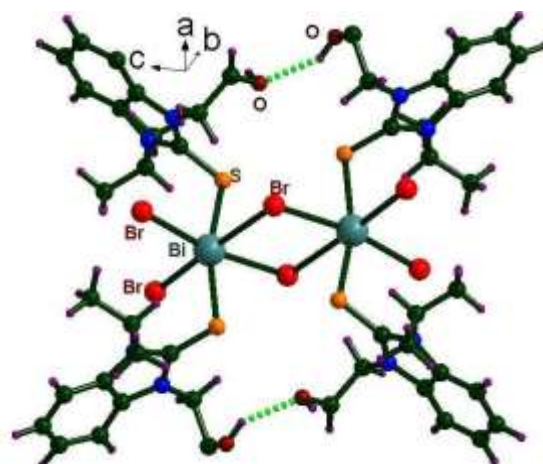

**Figure S20.** Molecular structure of **4** with intramolecular hydrogen bonding. Molecule **1** is isostructural to **4**.

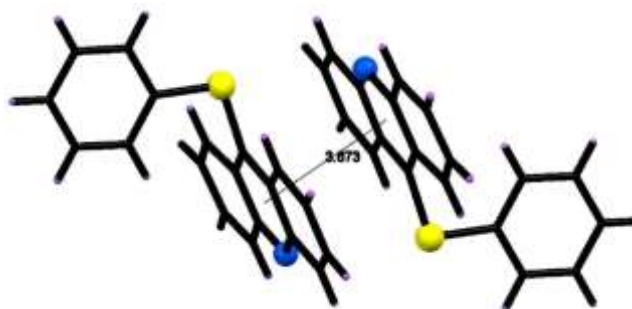

**Figure S21.** A weak  $\pi \cdots \pi$  stacking interaction between acridine rings in **IV**.

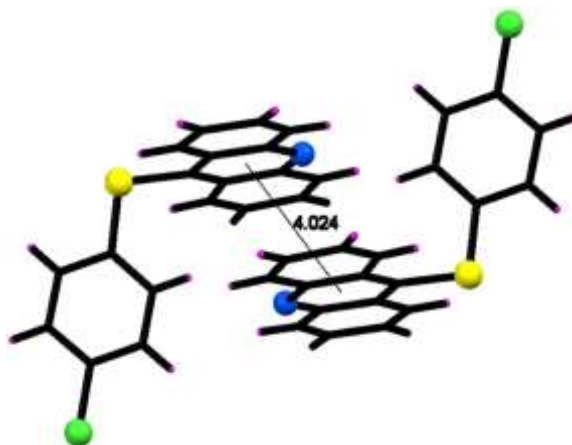

**Figure S22.** A weak  $\pi \cdots \pi$  stacking interaction between acridine rings in **V**.

**Table S1.** Crystal data and structure refinement for **1-4**

|                                             | <b>1</b>                                                                                                      | <b>2</b>                                                            | <b>3.CH<sub>3</sub>CN</b>                                            | <b>4</b>                                                                                                     |
|---------------------------------------------|---------------------------------------------------------------------------------------------------------------|---------------------------------------------------------------------|----------------------------------------------------------------------|--------------------------------------------------------------------------------------------------------------|
| CCDC                                        | 2129447                                                                                                       | 2129448                                                             | 2129449                                                              | 2129450                                                                                                      |
| Empirical formula                           | C <sub>48</sub> H <sub>64</sub> Bi <sub>2</sub> Cl <sub>6</sub> N <sub>8</sub> O <sub>4</sub> Se <sub>4</sub> | C <sub>12</sub> H <sub>16</sub> BiCl <sub>3</sub> N <sub>2</sub> OS | C <sub>12</sub> H <sub>16</sub> BiBr <sub>3</sub> N <sub>2</sub> OSe | C <sub>48</sub> H <sub>64</sub> Bi <sub>2</sub> Br <sub>6</sub> N <sub>8</sub> O <sub>4</sub> S <sub>4</sub> |
| Formula weight                              | 1763.61                                                                                                       | 551.68                                                              | 730.92                                                               | 1842.74                                                                                                      |
| Temperature/K                               | 293.15                                                                                                        | 293.0                                                               | 293.0                                                                | 293.0                                                                                                        |
| Crystal system                              | monoclinic                                                                                                    | monoclinic                                                          | triclinic                                                            | monoclinic                                                                                                   |
| Space group                                 | P2 <sub>1</sub> /n                                                                                            | P2 <sub>1</sub> /c                                                  | P-1                                                                  | P2 <sub>1</sub> /n                                                                                           |
| a/Å                                         | 9.148(2)                                                                                                      | 10.6327(2)                                                          | 7.6380(4)                                                            | 9.28018(15)                                                                                                  |
| b/Å                                         | 23.974(5)                                                                                                     | 10.36708(17)                                                        | 11.3080(4)                                                           | 23.7009(3)                                                                                                   |
| c/Å                                         | 14.150(3)                                                                                                     | 17.0092(3)                                                          | 13.1866(7)                                                           | 14.4183(3)                                                                                                   |
| α/°                                         | 90.00(3)                                                                                                      | 90                                                                  | 77.900(4)                                                            | 90                                                                                                           |
| β/°                                         | 95.19(3)                                                                                                      | 105.4866(19)                                                        | 78.288(4)                                                            | 94.9584(15)                                                                                                  |
| γ/°                                         | 90.00(3)                                                                                                      | 90                                                                  | 84.332(4)                                                            | 90                                                                                                           |
| Volume/Å <sup>3</sup>                       | 3090.5(12)                                                                                                    | 1806.84(6)                                                          | 1088.56(9)                                                           | 3159.41(9)                                                                                                   |
| Z                                           | 2                                                                                                             | 4                                                                   | 2                                                                    | 2                                                                                                            |
| ρ <sub>calc</sub> /g/cm <sup>3</sup>        | 1.8951                                                                                                        | 2.0279                                                              | 2.2298                                                               | 1.9369                                                                                                       |
| μ/mm <sup>-1</sup>                          | 8.347                                                                                                         | 24.290                                                              | 15.271                                                               | 16.853                                                                                                       |
| F(000)                                      | 1674.5                                                                                                        | 1033.3                                                              | 653.4                                                                | 1743.2                                                                                                       |
| Crystal size/mm <sup>3</sup>                | 0.08 × 0.07 × 0.07                                                                                            | 0.27 × 0.24 × 0.19                                                  | 0.09 × 0.08 × 0.07                                                   | 0.32 × 0.19 × 0.16                                                                                           |
| Radiation                                   | Mo Kα (λ = 0.71073)                                                                                           | Cu Kα (λ = 1.54184)                                                 | Mo Kα (λ = 0.71073)                                                  | Cu Kα (λ = 1.54184)                                                                                          |
| 2θ range for data collection/°              | 5.78 to 50                                                                                                    | 8.62 to 139.88                                                      | 5.8 to 58.2                                                          | 7.2 to 140.02                                                                                                |
| Index ranges                                | -11 ≤ h ≤ 12, -32 ≤ k ≤ 31, -18 ≤ l ≤ 17                                                                      | -11 ≤ h ≤ 12, -12 ≤ k ≤ 11, -20 ≤ l ≤ 11                            | -9 ≤ h ≤ 10, -10 ≤ k ≤ 14, -17 ≤ l ≤ 16                              | -10 ≤ h ≤ 11, -24 ≤ k ≤ 28, -15 ≤ l ≤ 17                                                                     |
| Reflections collected                       | 30790                                                                                                         | 6672                                                                | 8154                                                                 | 11869                                                                                                        |
| Independent reflections                     | 5434 [R <sub>int</sub> = 0.0626, R <sub>sigma</sub> = 0.0487]                                                 | 3365 [R <sub>int</sub> = 0.0325, R <sub>sigma</sub> = 0.0446]       | 4770 [R <sub>int</sub> = 0.0798, R <sub>sigma</sub> = 0.1136]        | 5874 [R <sub>int</sub> = 0.0597, R <sub>sigma</sub> = 0.0776]                                                |
| Data/restraints/parameters                  | 5434/2/326                                                                                                    | 3365/0/185                                                          | 4770/0/185                                                           | 5874/0/332                                                                                                   |
| Goodness-of-fit on F <sup>2</sup>           | 1.002                                                                                                         | 1.024                                                               | 0.927                                                                | 0.980                                                                                                        |
| Final R indexes [I >= 2σ (I)]               | R <sub>1</sub> = 0.0490, wR <sub>2</sub> = 0.1495                                                             | R <sub>1</sub> = 0.0346, wR <sub>2</sub> = 0.0872                   | R <sub>1</sub> = 0.0578, wR <sub>2</sub> = 0.1151                    | R <sub>1</sub> = 0.0544, wR <sub>2</sub> = 0.1286                                                            |
| Final R indexes [all data]                  | R <sub>1</sub> = 0.0568, wR <sub>2</sub> = 0.1756                                                             | R <sub>1</sub> = 0.0390, wR <sub>2</sub> = 0.0908                   | R <sub>1</sub> = 0.0910, wR <sub>2</sub> = 0.1321                    | R <sub>1</sub> = 0.0671, wR <sub>2</sub> = 0.1402                                                            |
| Largest diff. peak/hole / e Å <sup>-3</sup> | 2.74/-1.50                                                                                                    | 1.19/-2.04                                                          | 3.49/-3.97                                                           | 1.84/-2.83                                                                                                   |

**Table S2.** Crystal data and structure refinement for **IV**, and **V**

|                                             | <b>IV</b>                                                     | <b>V</b>                                                                                   |
|---------------------------------------------|---------------------------------------------------------------|--------------------------------------------------------------------------------------------|
| CCDC                                        | 2129451                                                       | 2129452                                                                                    |
| Empirical formula                           | C <sub>19</sub> H <sub>13</sub> NS                            | C <sub>1.19</sub> H <sub>0.75</sub> Cl <sub>0.06</sub> N <sub>0.06</sub> S <sub>0.06</sub> |
| Formula weight                              | 287.39                                                        | 321.83                                                                                     |
| Temperature/K                               | 293.0                                                         | 292                                                                                        |
| Crystal system                              | monoclinic                                                    | monoclinic                                                                                 |
| Space group                                 | P2 <sub>1</sub> /c                                            | I2/c                                                                                       |
| a/Å                                         | 7.4635(8)                                                     | 25.360(3)                                                                                  |
| b/Å                                         | 22.1889(13)                                                   | 7.5833(5)                                                                                  |
| c/Å                                         | 9.3494(9)                                                     | 33.138(3)                                                                                  |
| α/°                                         | 90                                                            | 90                                                                                         |
| β/°                                         | 110.628(12)                                                   | 110.162(11)                                                                                |
| γ/°                                         | 90                                                            | 90                                                                                         |
| Volume/Å <sup>3</sup>                       | 1449.1(3)                                                     | 5982.3(10)                                                                                 |
| Z                                           | 4                                                             | 16                                                                                         |
| ρ <sub>calc</sub> /cm <sup>3</sup>          | 1.3172                                                        | 1.4292                                                                                     |
| μ/mm <sup>-1</sup>                          | 1.894                                                         | 0.389                                                                                      |
| F(000)                                      | 602.9                                                         | 2661.2                                                                                     |
| Crystal size/mm <sup>3</sup>                | 0.67 × 0.62 × 0.52                                            | 0.077 × 0.065 × 0.062                                                                      |
| Radiation                                   | Cu Kα (λ = 1.54184)                                           | Mo Kα (λ = 0.71073)                                                                        |
| 2θ range for data collection/°              | 7.96 to 139.34                                                | 4.98 to 58.18                                                                              |
| Index ranges                                | -6 ≤ h ≤ 6, -18 ≤ k ≤ 25, -8 ≤ l ≤ 8                          | -33 ≤ h ≤ 21, -9 ≤ k ≤ 9, -42 ≤ l ≤ 42                                                     |
| Reflections collected                       | 2122                                                          | 12375                                                                                      |
| Independent reflections                     | 1301 [R <sub>int</sub> = 0.0148, R <sub>sigma</sub> = 0.0210] | 6817 [R <sub>int</sub> = 0.1147, R <sub>sigma</sub> = 0.3028]                              |
| Data/restraints/parameters                  | 1301/0/191                                                    | 6817/0/398                                                                                 |
| Goodness-of-fit on F <sup>2</sup>           | 1.097                                                         | 0.954                                                                                      |
| Final R indexes [I ≥ 2σ (I)]                | R <sub>1</sub> = 0.0339, wR <sub>2</sub> = 0.0889             | R <sub>1</sub> = 0.0800, wR <sub>2</sub> = 0.0909                                          |
| Final R indexes [all data]                  | R <sub>1</sub> = 0.0389, wR <sub>2</sub> = 0.0939             | R <sub>1</sub> = 0.3443, wR <sub>2</sub> = 0.1791                                          |
| Largest diff. peak/hole / e Å <sup>-3</sup> | 0.12/-0.17                                                    | 2.02/-1.25                                                                                 |
